# Supplementary material for: TAGLN2 is a candidate prognostic biomarker promoting tumorigenesis in human gliomas
Source: J Exp Clin Cancer Res. 2017 Nov 6;36:155. doi: 10.1186/s13046-017-0619-9 (PMC5674233; doi:10.1186/s13046-017-0619-9)
Supplement: Supplementary file 5 — List of TAGLN2-related genes. (XLSX 38 kb) [file 13046_2017_619_MOESM5_ESM.xlsx]

## Sheet: TAGLN2 positive-related genes
Supplementary Table 1. List of TAGLN2-related genes
GENE id
A2LD1
AAGAB
ABCC3
ACAA2
ACADS
ACN9
ACOT9
ACSS3
ACTL6A
ACTN1
ACTN4
ACTR3
ADAM12
ADAM9
ADAMTSL4
ADCK2
ADH5
ADM
ADPGK
ADPRHL2
ADPRH
ADRM1
AEBP1
AEN
AFAP1L1
AGA
AGTRAP
AHCY
AK2
AK3L1
AKIRIN1
ALG14
ALG1
ALG2
ALG3
ALG5
ALG8
ALOX5AP
ANAPC11
ANGPT2
ANG
ANKRD53
ANTXR2
ANXA1
ANXA2P1
ANXA2P2
ANXA2
ANXA4
ANXA5
AP1S2
AP1S3
AP2S1
AP3S1
AP4M1
APH1A
APITD1
APOBEC3B
APOBEC3C
APOBEC3D
APOBEC3F
APOBEC3G
AQP5
ARAF
ARAP3
ARF1
ARF4
ARF5
ARFIP1
ARHGAP15
ARHGAP18
ARHGAP29
ARHGDIB
ARL1
ARL2BP
ARL4C
ARMC10
ARNTL2
ARNTL
ARPC1A
ARPC1B
ARPC2
ARPC4
ARPC5
ARRDC3
ARSD
ARSJ
ARSK
ASF1B
ASL
ASNA1
ATF5
ATG10
ATG4A
ATG5
ATP1B3
ATP5EP2
ATP5F1
ATP5G3
ATP5J2
ATP5SL
ATP6AP2
ATP6V0B
ATP6V0E1
ATP6V1C2
AURKA
B2M
B3GALNT1
B3GNT5
B9D2
BACE2
BAK1
BATF3
BAX
BBS12
BCAP29
BCAP31
BCAS2
BCAT1
BCKDK
BCL10
BCL2L12
BCL3
BCL7B
BEST4
BFAR
BGN
BOD1
BOLA3
BRI3
BST1
BTG3
BUD31
BZW1
C11orf63
C12orf48
C13orf18
C13orf29
C14orf119
C14orf142
C14orf86
C16orf63
C16orf93
C17orf62
C18orf10
C19orf10
C19orf24
C19orf28
C19orf40
C19orf48
C19orf50
C19orf53
C19orf56
C1GALT1C1
C1QTNF2
C1RL
C1R
C1S
C1orf144
C1orf151
C1orf174
C1orf212
C1orf43
C1orf54
C1orf85
C1orf91
C20orf111
C20orf134
C20orf195
C20orf20
C20orf24
C20orf30
C21orf59
C21orf62
C21orf63
C21orf7
C2orf18
C2orf28
C3orf38
C3orf64
C3orf66
C4orf6
C5orf15
C5orf35
C5orf62
C6orf115
C6orf141
C6orf150
C6orf153
C7orf28A
C7orf30
C7orf42
C7orf46
C7orf47
C7orf49
C7orf50
C7orf68
C8orf48
C8orf76
C9orf21
C9orf64
C9orf6
C9orf89
CABP4
CALD1
CALHM2
CALR
CALU
CAMK2D
CANT1
CAP1
CAPG
CAPNS1
CAPZA1
CARD16
CARHSP1
CASP1
CASP3
CASP4
CASP6
CASP7
CASP8
CAST
CATSPER1
CAV2
CBR1
CCDC109B
CCDC123
CCDC125
CCDC46
CCNA2
CCNB1
CCNYL1
CD109
CD151
CD164
CD248
CD276
CD320
CD44
CD48
CD58
CD63
CD93
CD97
CD99
CDC20
CDC42
CDC6
CDCA8
CDCP1
CDH2
CDK2
CDKN2C
CDKN3
CEBPB
CEBPD
CENPA
CENPK
CENPL
CENPN
CEP55
CEPT1
CETN2
CFI
CFLAR
CHAF1B
CHCHD3
CHI3L1
CHID1
CHPF2
CHST12
CHST14
CHST2
CISD2
CKAP4
CKLF
CKM
CKS2
CLCF1
CLDN12
CLDN23
CLEC18A
CLEC18B
CLEC5A
CLIC1
CLIC4
CLN5
CLPP
CLPTM1L
CMC1
CMTM3
CMTM6
CNIH4
CNN3
CNPY4
COL4A1
COL4A2
COL5A2
COL6A1
COL6A2
COMMD10
COMMD7
COMMD8
COPB1
COPB2
COPE
COPS3
COPZ2
COQ2
COX6B1
COX7B
CPSF4
CPVL
CRLF3
CROT
CSNK1A1
CSTA
CSTB
CTBS
CTF1
CTNNA1
CTNNAL1
CTNNB1
CTSA
CTSB
CUL7
CXCR4
CXorf40A
CYB561D2
CYP2S1
DALRD3
DAP3
DAP
DBNL
DCTD
DDB2
DDOST
DDX39
DDX47
DEDD2
DEGS1
DENND2D
DENR
DEPDC1
DERL2
DERL3
DHDDS
DHRS13
DHRSX
DHX40
DIRAS3
DLGAP5
DMRTA2
DNAJB11
DNAJB9
DNAJC10
DNAJC22
DNAJC25
DNALI1
DNPEP
DNTTIP1
DOK1
DPAGT1
DPH3
DPM1
DPY19L1
DPY30
DPYD
DR1
DRAM1
DSN1
DTYMK
DUSP23
DYNLL1
DYNLT1
DYNLT3
DYRK3
E2F7
E2F8
ECE1
ECHDC2
ECSCR
ECT2
EDARADD
EDEM2
EFEMP1
EFEMP2
EFNB2
EGLN2
EHD2
EHD4
EID3
EIF2B3
EIF3I
EIF4A3
EIF5AL1
EIF6
ELF4
ELMOD2
EMILIN2
EMP1
EMP3
ENG
ENO1
ENPEP
EPS8
ERGIC1
ERGIC3
ERI1
ERMAP
ESYT1
ETF1
ETHE1
EVC2
EXOC3L2
EXT2
EXTL2
EYA4
F11R
F3
FABP5
FABP7
FADD
FAF1
FAH
FAM100B
FAM109B
FAM114A1
FAM114A2
FAM115C
FAM120AOS
FAM126A
FAM129A
FAM136A
FAM159A
FAM172A
FAM176B
FAM181A
FAM20C
FAM3C
FAM46A
FAM65C
FAM70B
FAM86B1
FAM86B2
FAM86C
FAM86D
FAM91A1
FAM96A
FAR2
FARS2
FASTKD2
FAS
FBLIM1
FBLN7
FBXL13
FBXO17
FBXO22OS
FBXO22
FBXO39
FBXO4
FBXW9
FCER1G
FCGR2A
FCGR2B
FCGR2C
FCGRT
FCHSD1
FEM1C
FES
FGFRL1
FGGY
FHL3
FHOD1
FKBP10
FKBP1A
FKBP9
FLAD1
FLJ10661
FLNA
FLOT1
FLOT2
FNDC3B
FPGT
FRMD8
FRRS1
FSIP1
FSTL1
FTSJ2
FUCA2
FXYD5
FYTTD1
FZD6
FZD7
G6PC3
G6PD
GADD45A
GAL3ST4
GALM
GALNS
GALNT2
GANAB
GBE1
GCLM
GDF15
GEMIN7
GGCX
GGH
GGN
GIMAP2
GINS1
GJC1
GLA
GLB1
GLIPR1
GLRX
GLT25D1
GLT8D1
GMPPA
GMPPB
GMPS
GNAI3
GNB2
GNG10
GNG12
GNG5
GNPDA1
GOLPH3
GPC1
GPN1
GPR108
GPR172A
GPR3
GPR65
GPX7
GPX8
GRB10
GRN
GRPEL2
GRWD1
GSDMD
GSS
GSTK1
GTF2E2
GTF3A
GUSB
GYS1
H2AFJ
HAT1
HAUS1
HAUS2
HBP1
HBXIP
HCCS
HDAC1
HDAC3
HDAC7
HDHD3
HEATR2
HEBP2
HEXA
HEXB
HFE
HINT1
HLA-A
HLA-DMB
HLA-DRA
HM13
HMGCL
HMGN2
HMGN4
HN1L
HPS3
HRH1
HS2ST1
HSD17B10
HSD3B7
HSP90B1
HSPA5
HSPB11
HSPB1
HSPC157
HSPG2
HYAL2
IAH1
ICAM3
ICMT
IDH1
IER5L
IER5
IFI30
IFITM2
IFITM3
IFNGR2
IFRD1
IFRD2
IFT52
IFT57
IGFBP2
IGFBP3
IGFBP7
IKBIP
IL10RB
IL13RA1
IL13RA2
IL17RC
IL1RAP
IL7
ILK
IMMT
INSIG2
IQCG
IQGAP1
IRAK4
ISG20
ITGA1
ITGA5
ITGA7
ITGB1BP1
ITGB1
ITGB3BP
ITGB3
ITPKC
JTB
KCNE3
KCNE4
KCTD14
KDELC2
KDELR1
KDELR2
KHNYN
KIAA0040
KIAA0101
KIAA0495
KIF18A
KIF20A
KIF9
KLHDC8A
KLHL4
KPNA2
KPNA4
KRT10
KTI12
KYNU
LAMB2
LAMC1
LAP3
LAPTM4A
LASS2
LASS5
LATS2
LCTL
LDHA
LENG9
LEPREL1
LEPROT
LGALS1
LGALS3BP
LGALS3
LGALS8
LITAF
LMAN1
LMAN2
LMNA
LMO2
LOC100132707
LOC154761
LOC401397
LOC407835
LOC493754
LOC541471
LOC550643
LOC644538
LOC647946
LOC653653
LOXL3
LOX
LPAR6
LRRC42
LRRC59
LRRFIP1
LRWD1
LSM10
LSM4
LSM5
LSP1
LTBR
LXN
LYPLA1
LYSMD3
MAEL
MAGOH
MAGT1
MAN1C1
MANEA
MANF
MAOB
MAP2K3
MAP3K6
MARVELD1
MBD2
MBOAT7
MCAM
MDK
MEA1
MED8
MEIS3P1
MELK
METTL7B
MFAP3
MFSD10
MFSD1
MFSD5
MGAT1
MGAT2
MGAT4B
MGC2752
MGST2
MICALL2
MIF
MIPEP
MIR155HG
MLF1IP
MLX
MMADHC
MMP14
MOBKL1B
MOSPD3
MPV17
MPZL2
MR1
MRC2
MREG
MRPL13
MRPL15
MRPL32
MRPL36
MRPL37
MRPL39
MRPL42
MRPS12
MRPS15
MRPS24
MSN
MSR1
MTCH2
MTFR1
MTHFS
MTMR11
MUL1
MXRA7
MXRA8
MYADM
MYCBP
MYD88
MYL12A
MYL12B
MYL6
MYO1B
MYOF
NAA10
NAA20
NAGA
NAMPT
NANP
NAT1
NCF1
NCRNA00152
NCSTN
NDUFA3
NDUFS5
NECAP2
NEIL3
NEK2
NEK6
NEU1
NFE2L3
NFKBIZ
NIP7
NIPA2
NIPSNAP3A
NKX2-5
NME2
NMI
NMNAT1
NNMT
NOP10
NOX4
NPC2
NPEPL1
NRAS
NRBP1
NRM
NRP1
NSUN7
NTAN1
NUCB1
NUDT19
NUP37
NUP54
NXT1
OAZ1
OCIAD2
OLFML2A
OLFML3
OR51E1
ORC5L
ORMDL2
OSBPL10
OSMR
OST4
OSTC
OSTM1
OVCA2
P4HB
PA2G4P4
PALLD
PALM2-AKAP2
PARP9
PARVB
PCNA
PCNP
PDCD1LG2
PDGFA
PDIA3P
PDIA4
PDIA5
PDIA6
PDK3
PDLIM1
PDLIM3
PDLIM4
PDLIM7
PDPN
PDRG1
PDZD11
PECAM1
PEF1
PELO
PEX2
PFN1
PGCP
PGK1
PGLS
PGM1
PGM2
PHB
PHF11
PHPT1
PHTF1
PIGB
PIGC
PIGK
PIGT
PION
PKD2
PKIB
PL-5283
PLA2G5
PLAUR
PLAU
PLBD1
PLEK2
PLEKHA4
PLEKHF2
PLEKHG1
PLIN2
PLK3
PLOD1
PLOD2
PLOD3
PLP2
PLS3
PLSCR1
PLSCR3
PMM2
PMP22
PMS2L2
PNO1
PNPLA4
PNP
POFUT1
POLE2
POLR1D
POLR2I
POLR2L
POMGNT1
POP4
POR
PPA2
PPCS
PPDPF
PPIA
PPIB
PPIC
PPIH
PPIL5
PPM1M
PPP1CA
PPP1CB
PPP1R15A
PPP1R3B
PPP4C
PQLC2
PQLC3
PRDX4
PRICKLE3
PRKCDBP
PRMT6
PROCR
PROS1
PRPS2
PRR24
PRR7
PRUNE
PSMA1
PSMA2
PSMA5
PSMA7
PSMB2
PSMB3
PSMB4
PSMB8
PSMC2
PSMC4
PSMD12
PSMD14
PSMD5
PSMD8
PSMD9
PSMG3
PSRC1
PTGFRN
PTGR1
PTMA
PTN
PTPN12
PTPN22
PTPN2
PTPN7
PTPN9
PTRF
PTTG1
PUSL1
PVRL2
PVT1
PYGL
QPCTL
RAB27A
RAB32
RAB33B
RAB34
RAB36
RAB42
RAB8A
RABAC1
RABL5
RAC2
RAD54B
RAET1K
RALB
RANBP9
RAN
RAP1A
RAP1B
RAP2B
RAP2C
RARS
RASSF1
RBM7
RBMS1
RBP1
RCAN1
RCAN3
RDM1
REEP4
RELB
RER1
REXO2
RFC2
RGS19
RHBDD2
RHOA
RHOC
RHOJ
RIN1
RINL
RINT1
RIOK3
RIPK1
RIT1
RNASE4
RNF135
RNF14
RNF181
RNF7
RNFT1
ROBLD3
ROMO1
RP2
RPA3
RPAP2
RPF1
RPL41
RPN1
RPN2
RPS2P32
RRAS
RRM2
RSRC1
RTCD1
RUNX1
RUVBL1
S100A10
S100A11
S100A13
S100A16
S100A4
S100A6
SAR1B
SAT1
SBDSP1
SBNO2
SC65
SCPEP1
SCYL2
SDCBP
SDF2L1
SDF4
SDHC
SEC22B
SEC24D
SEC61A1
SEC61B
SELS
42628
SEPHS2
SEPN1
42622
SERPINA1
SERPINA3
SERPINB1
SERPINB6
SERPINB8
SERPINE1
SERPING1
SERPINH1
SERTAD1
SERTAD3
SF3A3
SFRS9
SGSH
SH2D4A
SH3BGRL3
SH3GLB1
SHC1
SHCBP1
SHISA5
SHOX2
SHQ1
SHROOM3
SIL1
SKA1
SLAIN2
SLBP
SLC10A3
SLC16A3
SLC22A18
SLC25A19
SLC25A24
SLC25A39
SLC25A43
SLC25A45
SLC26A2
SLC27A3
SLC2A10
SLC2A4RG
SLC2A9
SLC30A5
SLC30A7
SLC31A1
SLC33A1
SLC35A2
SLC35A4
SLC35B1
SLC35C1
SLC35D1
SLC35D2
SLC35F5
SLC39A1
SLC39A3
SLC39A8
SLC43A3
SLC4A3
SLFN12
SMAGP
SMC4
SMS
SNAP23
SNAPC2
SNRNP40
SNRPB
SNRPD2
SNUPN
SNX10
SNX17
SNX3
SOAT1
SOCS3
SOD2
SP100
SP140L
SPAG4
SPATA17
SPATA6
SPATS2L
SPCS3
SPINK8
SPPL2A
SPRY1
SPRY2
SQRDL
SRA1
SRPRB
SRPR
SRPX2
SSBP1
SSBP2
SSBP4
SSH3
SSNA1
SSR3
ST20
STARD3NL
STBD1
STEAP1
STEAP3
STIL
STK17A
STK40
STT3A
STX2
SUMF1
SUMO1P3
SUMO3
SURF4
SUSD2
SWAP70
SYDE1
SYPL1
TAF10
TAF12
TAF13
TAF9
TANK
TBC1D1
TBC1D23
TBCA
TBL2
TCEA3
TCIRG1
TCTN1
TCTN2
TEAD3
TES
TEX261
TFG
TFRC
TGFB1I1
TGFB1
TGFBI
TGIF1
TICAM2
TIFA
TIMP1
TK1
TM9SF1
TMBIM1
TMBIM4
TMCO1
TMED10
TMED1
TMED2
TMED3
TMED4
TMED5
TMED7
TMED9
TMEM106C
TMEM107
TMEM109
TMEM111
TMEM147
TMEM149
TMEM154
TMEM158
TMEM159
TMEM165
TMEM168
TMEM176B
TMEM179B
TMEM185B
TMEM188
TMEM194B
TMEM205
TMEM214
TMEM22
TMEM43
TMEM45A
TMEM48
TMEM49
TMEM50A
TMEM50B
TMEM51
TMEM54
TMEM59
TMEM5
TMEM60
TMEM61
TMEM64
TMEM67
TMEM70
TMEM71
TMEM8A
TMSB10
TNC
TNFAIP6
TNFRSF11B
TNFRSF12A
TNFRSF14
TNFRSF19
TNFRSF1A
TNFSF12-TNFSF13
TOM1L1
TOMM5
TOR1A
TOR1B
TOR3A
TP53I13
TPD52L2
TPI1
TPM3
TPM4
TPRA1
TPRG1
TPST1
TRADD
TRAF5
TRAM1
TRAPPC2P1
TRAPPC3
TRAPPC5
TRIAP1
TRIM21
TRIM5
TRIM6
TRIP10
TRIP13
TRIP4
TRIP6
TRNAU1AP
TSEN34
TSPAN17
TSPAN4
TSPAN6
TSPO
TSTD1
TTC12
TTC26
TTC38
TTC39A
TTC4
TTYH3
TUBA1B
TUBA1C
TUBB2C
TUBB6
TWF1
TWF2
TWISTNB
TWSG1
TXLNA
TXNDC12
TXNDC15
TXNDC17
TXNDC5
TXN
TYMS
UBE2A
UBE2D2
UBE2D3
UBE2F
UBE2J2
UBE2MP1
UBE2N
UBE2Z
UBE3C
UBL4A
UBL5
UCHL3
UGCG
ULBP2
ULBP3
ULK4
UNC45A
UNC93B1
UPP1
UQCR11
UQCRQ
UROD
USO1
VAMP3
VAMP5
VAMP8
VASN
VASP
VEGFA
VIM
VKORC1
VPS25
VPS29
VWA1
WARS2
WBP5
WDR1
WDR34
WDR41
WDR61
WDR77
WEE1
WIPI1
WTAP
WWTR1
XBP1
XKR8
XRN2
YDJC
YIF1B
YIPF1
YIPF2
YIPF5
ZAK
ZCCHC9
ZDHHC12
ZDHHC18
ZDHHC1
ZDHHC4
ZFAND2A
ZFAND6
ZFP36L2
ZMPSTE24
ZNF207
ZNF20
ZNF217
ZNF410
ZNF416
ZNF436
ZNF530
ZNF552
ZNF584
ZNF593
ZNF600
ZNF765
ZNF816A
ZNF90
ZYX

## Sheet: TAGLN2 negative-related genes
GENE id
AARS
ABAT
ABCA3
ABHD6
ABI1
ABL2
ABLIM1
ACACA
ACADSB
ACBD5
ACO2
ACTR1A
ACVR2B
ADAMTS13
ADCK1
ADCY5
ADD1
ADHFE1
ADO
ADRBK2
AKAP11
AKAP1
AKAP6
ALCAM
ALDH2
ALDH5A1
ALDOC
ALS2CR8
AMOTL2
ANKRD12
ANKRD13B
ANKRD16
ANKRD26
ANKRD28
ANKRD46
AP2B1
APBA2
APBB1
APC2
ARFGAP2
ARHGAP12
ARHGAP32
ARHGEF9
ARID1B
ARID4A
ARID4B
ARPP21
ASB13
ASB1
ASCC1
ASH1L
ASXL3
ATAD1
ATG2B
ATM
ATP6V0A1
ATP6V1G2
ATP8A1
ATP9A
BAI3
BAZ2B
BCL7A
BCR
BDP1
BEND7
BEX4
BIRC6
BMP2
BMPR2
BMS1
BOD1L
BRD1
BRD3
BRD7
BRF1
BRSK2
BRWD1
BTRC
BZRAP1
C10orf118
C10orf137
C10orf18
C10orf28
C10orf2
C10orf4
C10orf88
C11orf2
C12orf34
C12orf51
C12orf53
C14orf132
C14orf21
C17orf39
C17orf68
C17orf69
C17orf96
C20orf194
C22orf27
C22orf39
C4orf12
C5orf53
C6orf136
C6orf168
C6orf174
C6orf47
C7orf54
C9orf125
CACNA2D2
CADM2
CAMSAP1L1
CAMSAP1
CASC3
CASKIN1
CBARA1
CBFA2T3
CCBL1
CCDC120
CCDC6
CCDC85C
CCDC88A
CCNY
CDC42BPB
CDH10
CDH20
CDHR1
CDK5R1
CECR2
CECR6
CELF2
CEP250
CEP350
CEP68
CGREF1
CHD2
CHD3
CHD6
CHD7
CHD8
CHRNA4
CLASP2
CLCN6
CLEC16A
CLIP3
CNNM2
CNRIP1
COX15
CPEB3
CRAMP1L
CREBBP
CRTC1
CRY2
CSDC2
CSMD3
CSNK1E
CSTF2T
CTBP2
CTTNBP2
CUL9
CXXC4
CXorf1
CYTH1
DCAF11
DCTN1
DDB1
DDX25
DDX42
DDX51
DDX6
DEAF1
DENND5A
DENND5B
DGCR14
DHTKD1
DHX38
DIP2A
DIP2C
DIS3L2
DLG5
DLGAP1
DMXL1
DMXL2
DNAJB12
DNAJC12
DNAJC27
DNM3
DOPEY1
DPP10
DPYSL4
DRP2
DSCAML1
DST
DUSP26
DYNC1H1
DYNLL2
DZIP3
EBF4
EFR3B
EHMT2
EIF3A
EIF3L
EIF4EBP2
EIF4ENIF1
ELFN2
ELMO1
EML5
ENOX1
EPC1
ERCC5
ERCC6
EVI5L
EVL
EXOC8
EZH1
FAIM2
FAM110B
FAM117B
FAM123A
FAM126B
FAM133A
FAM13C
FAM149B1
FAM155A
FAM160B1
FAM161B
FAM168B
FAM169A
FAM171A1
FAM171A2
FAM171B
FAM188A
FAM190B
FAM192A
FAM19A5
FAM21C
FAM22A
FAM22D
FAM35B
FAM57B
FBLL1
FBRSL1
FBXL19
FBXO11
FBXO18
FBXW11
FBXW4
FCHSD2
FERMT1
FLJ10038
FLJ35220
FLJ90757
FLRT1
FLYWCH1
FOXN3
FOXO3B
FOXO3
FOXO4
FRMD4A
FRS3
FRY
FUT9
FXR2
FXYD6
GABBR1
GABRB3
GALNT13
GATS
GBF1
GCLC
GCSH
GDAP1
GDPD1
GGA1
GIGYF2
GIT1
GLUD1
GNAI1
GNAL
GNAO1
GNAZ
GOPC
GPATCH8
GPHN
GPM6A
GPR123
GPR173
GPSM1
GRAMD1B
GRIA2
GRIA4
GRID1
GRIK4
GRIPAP1
GTPBP1
H2AFY2
HDAC4
HDAC5
HEATR5B
HECA
HECTD1
HELZ
HERC1
HERC2
HERC4
HIF1AN
HINT3
HIPK2
HIRA
HIRIP3
HNRNPA3P1
HNRNPH3
HNRNPUL2
HOOK3
HPS4
HSFX2
HTATSF1
HUWE1
ICK
IDI1
IGHMBP2
IKZF5
IL1RAPL1
INO80D
INO80
INPP1
INPP5A
INTS2
ITPK1
JARID2
JHDM1D
JMJD1C
JMY
JPH3
JPH4
JRK
KBTBD6
KBTBD7
KCNB1
KCNIP3
KCNJ10
KDM3B
KDM4B
KIAA0232
KIAA0240
KIAA0427
KIAA0430
KIAA0649
KIAA0652
KIAA0664
KIAA0913
KIAA1109
KIAA1147
KIAA1279
KIAA1543
KIAA1755
KIAA1967
KIAA2018
KIAA2026
KIDINS220
KIF13A
KIF1A
KIF1B
KIF21B
KIF2A
KIF3A
KIF5B
KLC4
KLF12
KLF13
KLHDC1
KLHDC3
KLHL28
KLHL32
KLRC3
KSR1
KSR2
L2HGDH
LARP4B
LDB1
LHFPL4
LMTK3
LOC100129550
LOC100286844
LOC219347
LOC254559
LOC283267
LOC339674
LOC399744
LOC441666
LOC643387
LOC650623
LOC728643
LOC92973
LPHN1
LPHN3
LPIN1
LRCH2
LRIG1
LRP1B
LRRC16B
LRRC1
LRRC20
LRRC27
LRRC37A4
LRRC37B
LRRC4C
LRRC4
LRRTM3
LRRTM4
LRSAM1
LSAMP
MADD
MAP2
MAP4K5
MAPK10
MAPK8IP2
MAPK8IP3
MAPK8
MAPT
42434
42437
MAST1
MATR3
MBD5
MBTD1
MCF2L2
MDGA2
MDN1
MED13L
METTL10
MGAT3
MGAT4C
MGEA5
MIB1
MICAL3
MIPOL1
MKRN3
MLLT6
MLL
MMS19
MN1
MORN4
MPRIP
MRFAP1
MTA3
MTMR15
MTMR1
MTMR3
MTMR7
MTMR9
MTPAP
MTSS1L
MUM1
MXI1
MYCBP2
MYH14
MYO18A
MYST1
MYST4
NACAP1
NALCN
NAP1L3
NBR1
NCAM1
NCAM2
NCOA1
NDRG2
NDRG3
NET1
NEURL4
NF1
NF2
NIPBL
NISCH
NLGN2
NMNAT2
NMT2
NOL4
NOLC1
NPIP
NR1D2
NRG3
NRXN1
NRXN2
NSUN6
NTM
NTNG2
NTRK2
NUMA1
OAT
OLIG2
OMG
OPHN1
OSBPL2
OTUD5
OTUD7A
PABPC5
PAFAH1B1
PAR-SN
PAR5
PARG
PATZ1
PBLD
PCBP3
PCDH11X
PCDH15
PCDH7
PCMTD1
PCNT
PC
PDCD11
PDCD4
PDP2
PDZD4
PDZD8
PELI2
PELP1
PFKM
PHACTR3
PHF16
PHF20
PHF21A
PHF21B
PHF2
PHF3
PHLPP1
PHLPP2
PHYHIPL
PIK3R1
PIKFYVE
PIP4K2B
PLA2G6
PLCB1
PLCL1
PLEKHM3
PNMA1
POLL
POLR3A
PORCN
POU6F1
PPP1R3E
PPP1R9A
PPP1R9B
PRDM10
PRDM11
PRKCA
PTCHD2
PTPRT
PUM2
PURA
PVRL1
RAB18
RAB5B
RAB6C
RABEP1
RABGAP1
RAI2
RALGAPA1
RALGPS1
RAP2A
RAPGEF2
RASGEF1C
RASL10A
RB1CC1
RBM17
RC3H1
RCOR2
REPS2
RFTN2
RFX7
RGPD3
RGPD4
RIC3
RICTOR
RNASEN
RNF112
RNF146
RNF165
RPL17
RPRD2
RPS6KA5
RPS6KL1
RSF1
RTN1
RTN3
RUFY2
RUFY3
RUNDC3A
RUNX1T1
RUSC2
SAFB
SAMD14
SAMD8
SAPS2
SART1
SATB1
SBF1
SCAI
SCAMP5
SCAPER
SCD
SDCCAG1
SEC24C
SECISBP2L
SEMA4G
SEMA6B
42616
SERP2
SGK269
SGMS1
SGSM1
SGSM2
SH3GL2
SHANK2
SHD
SHF
SHISA7
SHPRH
SIK3
SIRT1
SLC12A6
SLC16A9
SLC1A6
SLC22A17
SLC23A2
SLC25A23
SLC25A27
SLC25A28
SLC25A41
SLC2A11
SLC4A1AP
SLC9A6
SLITRK1
SLITRK5
SMAD7
SMAD9
SMARCC2
SMOC1
SMPD3
SNAP91
SNAPC4
SNX27
SOBP
SOCS7
SORCS3
SOS2
SOX6
SOX8
SPAG9
SPAST
SPHKAP
SPIN3
SPIRE1
SPTAN1
SPTBN2
SREBF2
SRGAP3
SS18L1
SSBP3
ST13
STAM
STARD10
SUFU
SUGT1L1
SURF6
SUV420H1
SYNRG
TAB1
TAF3
TAOK2
TAPT1
TARSL2
TAS2R4
TBC1D14
TBC1D24
TBC1D5
TBKBP1
TBRG1
TCEAL2
TCEAL3
TCF20
TCF25
TECTA
TEF
TERF2IP
TERF2
TET1
TET3
TFAP4
THNSL1
THRA
THUMPD1
TLK2
TM9SF3
TMCC1
TMCC2
TMED8
TMEFF2
TMEM136
TMEM170B
TMEM180
TMEM30A
TMEM8B
TMOD2
TNK2
TNKS2
TNPO2
TNRC6B
TNRC6C
TOM1L2
TOP2B
TPTE2P1
TRAK1
TRAM1L1
TRAPPC9
TRIM23
TRIM8
TSC1
TSC2
TSHZ1
TSNARE1
TSPAN7
TSPYL4
TTBK1
TTC33
TTC3
TTLL12
TUBGCP2
TUBGCP4
TUB
TUT1
TXNDC16
UBE2O
UBN2
UBQLN2
UBQLN4
UBR3
UBTF
UHRF1BP1L
UNC5A
UNKL
UPF2
USP11
USP20
USP27X
USP34
USP43
USP47
USP54
USP7
VCPIP1
VPS33B
VPS4A
VPS52
VPS53
VTI1A
WAC
WAPAL
WASF3
WBP2
WDFY3
WDR37
WDR48
WDR59
YLPM1
YPEL1
YPEL4
YTHDC1
ZBTB43
ZBTB44
ZBTB47
ZBTB4
ZC3H12B
ZC3H6
ZC3H7B
ZCCHC14
ZCCHC24
ZDHHC17
ZDHHC22
ZFP41
ZFP62
ZFYVE20
ZFYVE27
ZHX2
ZKSCAN2
ZMIZ1
ZMYND11
ZNF142
ZNF197
ZNF236
ZNF248
ZNF25
ZNF275
ZNF276
ZNF280B
ZNF292
ZNF33A
ZNF37A
ZNF397
ZNF407
ZNF423
ZNF445
ZNF493
ZNF517
ZNF518A
ZNF540
ZNF609
ZNF638
ZNF687
ZNF696
ZNF711
ZNF721
ZNF737
ZNF740
ZNF74
ZNF770
ZNF778
ZNF821
ZNF839
ZNF91
ZRANB1
ZSCAN29
ZSCAN2
